# Supplementary material
Source: publisher figshare collection journal article supplement (https://acs.figshare.com/ndownloader/files/18651617)
Supplement: Supplementary file 1 [file 18651617]

## Supporting Information

### Pressure-Induced Structural Phase Transformation and Yield Strength of AlN

Hong Yu<sup>†</sup>, Fang Peng<sup>\*,†</sup>, Hao Liang<sup>†</sup>, Shixue Guan<sup>†</sup>, Lijie Tan<sup>†,‡</sup>, Zhengbi Xiong<sup>†</sup>, Xiaojun Xiang<sup>†</sup>, Qingze Li<sup>†</sup>, Li Lei<sup>†</sup>, and Duanwei He<sup>†</sup>

<sup>†</sup>*Institute of Atomic and Molecular Physics, Sichuan University, Chengdu 610065, People's Republic of China*

<sup>‡</sup>*Center for High Pressure Science and Technology Advanced Research (HPSTAR), Shanghai*

\*Corresponding author: fangpeng18@yahoo.com

#### Line-width analysis

The synchrotron radiation X-ray diffraction line profiles from the polycrystalline sample under nonhydrostatic uniaxial compression in a DAC exhibit broadening with increasing pressure. This broadening is attributed to two main factors: the reduction in grain size results in diffraction line broadening that varies with  $1/\cos\theta$ , where  $\theta$  is the diffraction angle; the broadening produced by the presence of micro-strains varies with  $\tan\theta$ . The theory of diffraction line broadening proposed earlier was derived from deformed metal and extended for the analysis of high pressure data at present<sup>1-3</sup>. The following formula describes the relation between the grain size and strain dependencies of diffraction line width:

$$(2\omega_{hkl}\cos\theta_{hkl})^2 = (\lambda/d)^2 + \eta_{hkl}^2\sin^2\theta_{hkl}, \quad (1)$$

where  $2\omega_{hkl}$  is the full-width at half-maximum (FWHM) of the diffraction profile. The symbols  $\lambda$ ,  $d$ ,  $\eta_{hkl}$  denote the X-ray wavelength, sample grain size, and the microscopic deviatoric strain, respectively. The micro-strains can be obtained from the following relation:

$$\eta_{hkl}^2 = [(2\omega_{hkl}\cos\theta_{hkl})^2 - (\lambda/d)^2]/\sin^2\theta_{hkl}, \quad (2)$$

The expression for the  $(hkl)$ -dependence of  $\eta_{hkl}$  was made under the assumption that all of the stresses between 0 and  $p_{max}$  in the crystallite are possibly equal. The

relation proposes that  $\eta_{hkl}$  depends on  $E(hkl)$ , so the Young's modulus values are in conformity to the following relation in the direction  $[h\ k\ l]$ :

$$\eta_{hkl} = 4p_{max}/E(h\ k\ l), \quad (3)$$

The  $p_{max}$  could be calculated by  $\eta_{hkl}$  using Eq. (3) when the elastic moduli of single crystals are known. The aggregate  $E$  can be obtained from the bulk modulus  $K$  and the shear modulus  $G$  by the following relation:

$$E = 9KG/(3K + G). \quad (4)$$

Many other materials<sup>3, 4</sup> suggest that  $t$  obtained from the line-shift analysis and  $p_{max}$  obtained from the line-width analysis satisfy the relation  $2p_{max} \cong t$ . Both  $t$  and  $2p_{max}$  are taken as measures of compressive strength. The yield strength  $Y$  can thus be obtained from the following relation:

$$Y = t = \varepsilon E. \quad (5)$$

where  $\varepsilon$  is the average value of  $\eta_{hkl}$ .

## References

- (1) Leineweber, A.; Dinnebier, R. E., Anisotropic microstrain broadening of minium,  $Pb_3O_4$ , in a high-pressure cell: interpretation of line-width parameters in terms of stress variations. *J. Appl. Crystallogr* **2010**, *43*, 17–26.
- (2) Liang, H.; Chen, H.; Peng, F.; Liu, L.; Li, X.; Liu, K.; Liu, C.; Li, X., High-pressure strength and compressibility of titanium diboride (TiB<sub>2</sub>) studied under non-hydrostatic compression. *J. Phys. Chem. Solids* **2018**, *121*, 256-260.
- (3) Singh, A. K.; Liermann, H. P.; Saxena, S. K., Strength of magnesium oxide under high pressure: evidence for the grain-size dependence. *Solid State Commun* **2004**, *132*, 795-798.
- (4) Chen, J.; Weidner, D. J.; Vaughan, M. T., The strength of  $Mg_{0.9}Fe_{0.1}SiO_3$  perovskite at high pressure and temperature. *Nature* **2002**, *419*, 824-6.
